# Supplementary material for: Experimental and theoretical studies on pyrene-grafted polyoxometalate hybrid
Source: Royal Society of Chemistry journal article supplement (doi:10.1039/c2dt31474f), 2012-01-01
Supplement: c2dt31474f.pdf [file c2dt31474f.pdf]

# Experimental and Theoretical Studies on Pyrene-grafted Polyoxometalate Hybrid

Junkuo Gao<sup>1</sup>, Xinfeng Liu<sup>2</sup>, Yi Liu<sup>1</sup>, Lingling Yu<sup>1</sup>, Yuhua Feng<sup>2</sup>, Hongyu Chen<sup>2</sup>,  
Yongxin Li<sup>2</sup>, Ganguly Rakesh<sup>2</sup>, Cheng Hon Alfred Huan<sup>2</sup>, Tze Chien Sum<sup>2</sup>, Yang  
Zhao<sup>1</sup>, Qichun Zhang<sup>\*,1</sup>

<sup>1</sup>School of Materials Science and Engineering, Nanyang Technological University, Singapore 639798, Singapore and <sup>2</sup>School of Physical and Mathematical Sciences, Nanyang Technological University, Singapore 637371, Singapore

## Supporting Information:

### 1. Crystal data of MoAP.

**Table S1.** Crystal data and structure refinement for **MoAP**.

|                                   |                                                                                                                |
|-----------------------------------|----------------------------------------------------------------------------------------------------------------|
| Empirical formula                 | C <sub>48</sub> H <sub>81</sub> Mo <sub>6</sub> N <sub>3</sub> O <sub>18</sub>                                 |
| Formula weight                    | 1563.80                                                                                                        |
| Crystal system                    | Triclinic                                                                                                      |
| Space group                       | P-1                                                                                                            |
| Unit cell dimensions              | a = 12.3547(6) Å    α = 78.355(2)°<br>b = 12.8923(6) Å    β = 78.467(2)°<br>c = 19.6931(9) Å    γ = 72.716(2)° |
| Volume                            | 2900.4(2) Å <sup>3</sup>                                                                                       |
| Z                                 | 2                                                                                                              |
| Density (calculated)              | 1.791 Mg/m <sup>3</sup>                                                                                        |
| Goodness of fit on F <sup>2</sup> | 1.058                                                                                                          |
| Final R indices [I > 2σ(I)]       | R1 = 0.0595, wR2 = 0.1323                                                                                      |
| R indices (all data)              | R1 = 0.1463, wR2 = 0.1893                                                                                      |

## 2. The photophysical properties of 1AP in acetonitrile

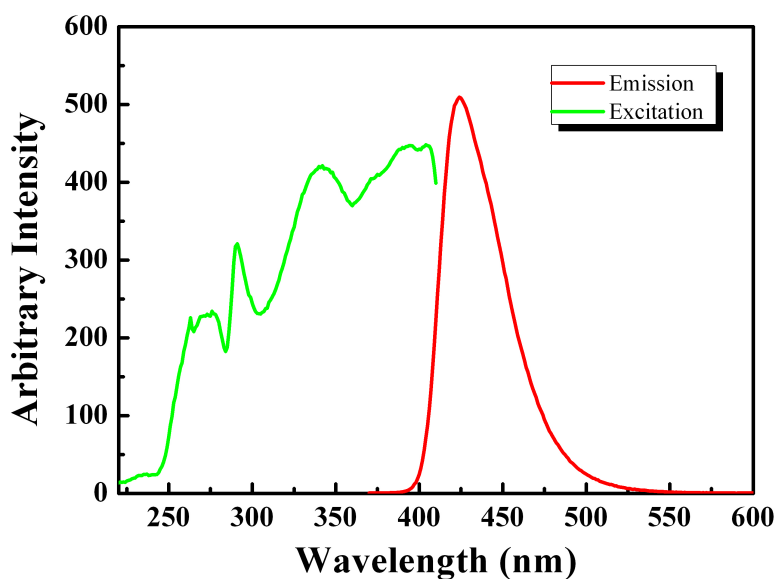

**Figure S1.** The excitation and emission spectra of **1AP** in acetonitrile at the concentration of  $2.5 \times 10^{-5}$  M.

## 3. The molecular orbital scaled energy diagrams of MoAP, 1AP and Mo<sub>6</sub>O<sub>19</sub>

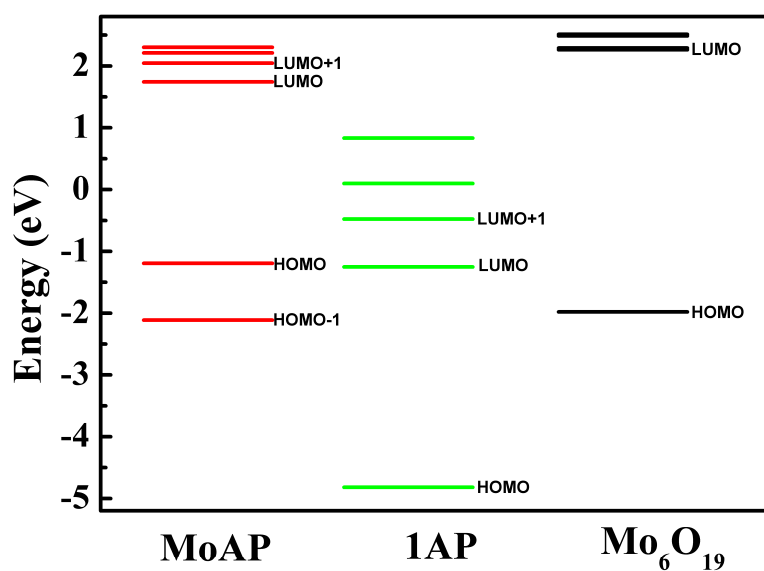

**Figure S2.** Molecular orbital scaled energy diagrams of **MoAP**, **1AP** and **Mo<sub>6</sub>O<sub>19</sub>**.
